# Supplementary material for: Electrochemiluminescent screening for methamphetamine metabolites
Source: Royal Society of Chemistry journal article supplement (doi:10.1039/d1an00226k), 2021-01-01
Supplement: d1an00226k1.pdf [file d1an00226k1.pdf]

# Supporting Information for:

# Electrochemiluminescent Screening for

# Methamphetamine Metabolites

Emre Dokuzparmak, Kelly Brown and Lynn Dennany\*

WestChem Department of Pure and Applied Chemistry

University of Strathclyde

Technology and Innovation Centre

99 George Street

Glasgow

G1 1RD

\* corresponding author's email: [lynn.dennany@strath.ac.uk](mailto:lynn.dennany@strath.ac.uk)

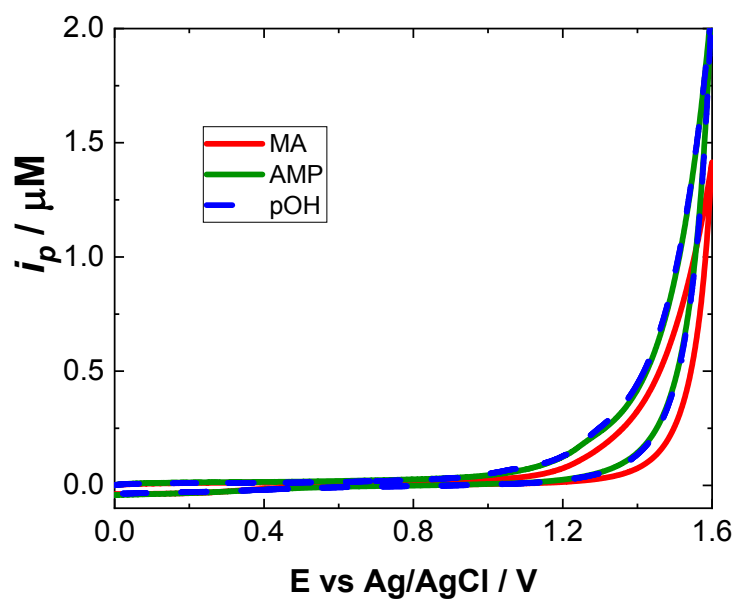

**Figure S1.** Typical CV for 150 mM MA (red line), AMP (green line) and pOH (blue dashed line) in 0.1 M PBS at pH 7.0 scanned over the potential range  $0.0 \leq E \leq 1.6$  V vs Ag/AgCl at a scan rate of  $100 \text{ mVs}^{-1}$ .

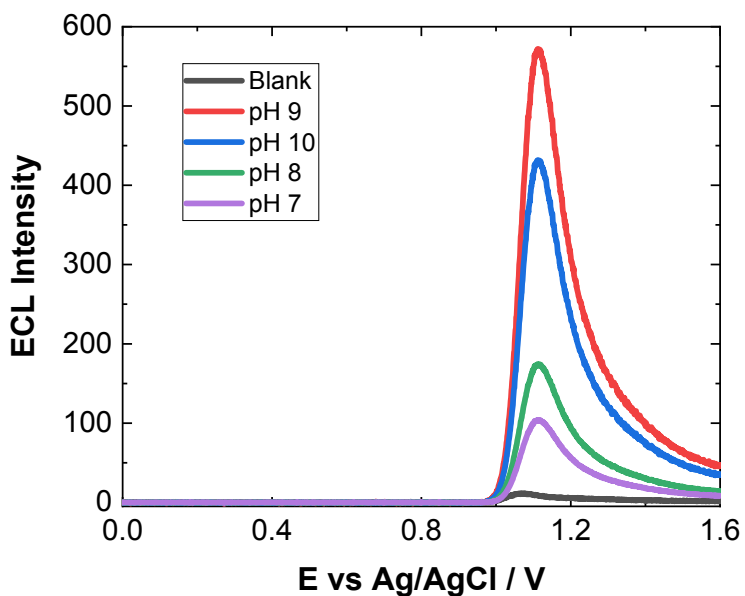

**Figure S2.** ECL response for 200  $\mu\text{M}$  MA in 0.1 M PBS at pH 7.0 (purple line), pH 8.0 (green line), pH 9.0 (red line), pH 10 (blue line) and a blank (black line) scanned over the potential range  $0.8 \leq E \leq 1.6$  V vs Ag/AgCl at a scan rate of  $100 \text{ mVs}^{-1}$ . PMT was biased at 650 V.

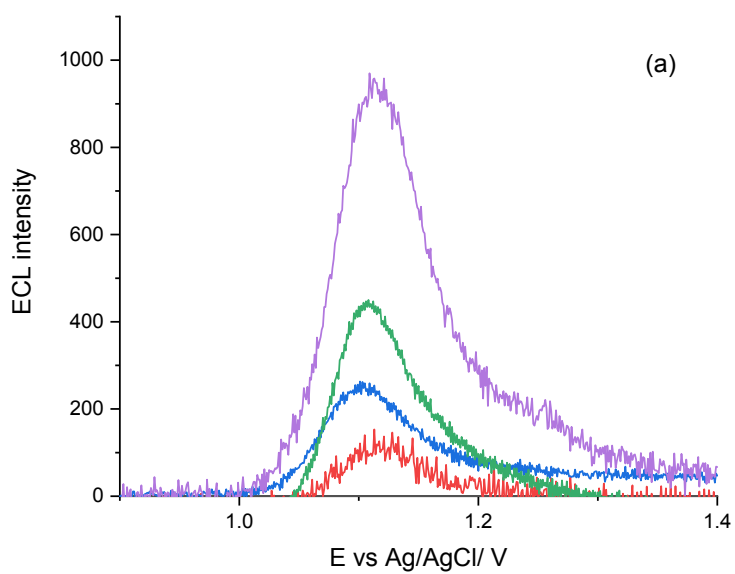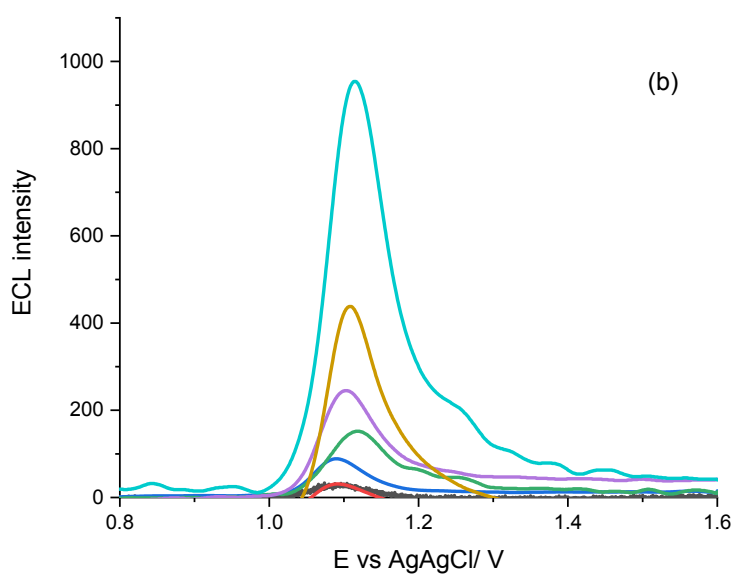

**Figure S3.** (a) ECL response for increasing [MA] in 0.1 M PBS at pH 7.0. (b) ECL response for increasing [AMP] in 0.1 M PBS at pH 7.0 scanned over the potential range  $0.8 \leq E \leq 1.6$  V vs Ag/AgCl at a scan rate of  $100 \text{ mVs}^{-1}$ . PMT was biased at 650 V.

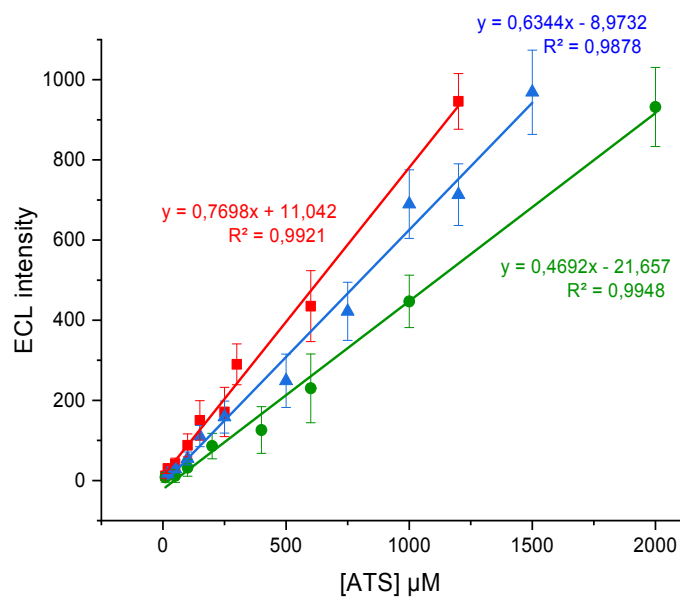

**Figure S4.** (a) Typical trend of maximum ECL signal against [ATS] at pH 7.0 for MA (red squares), AMP (green circles) and pOH-MA (blue triangles).

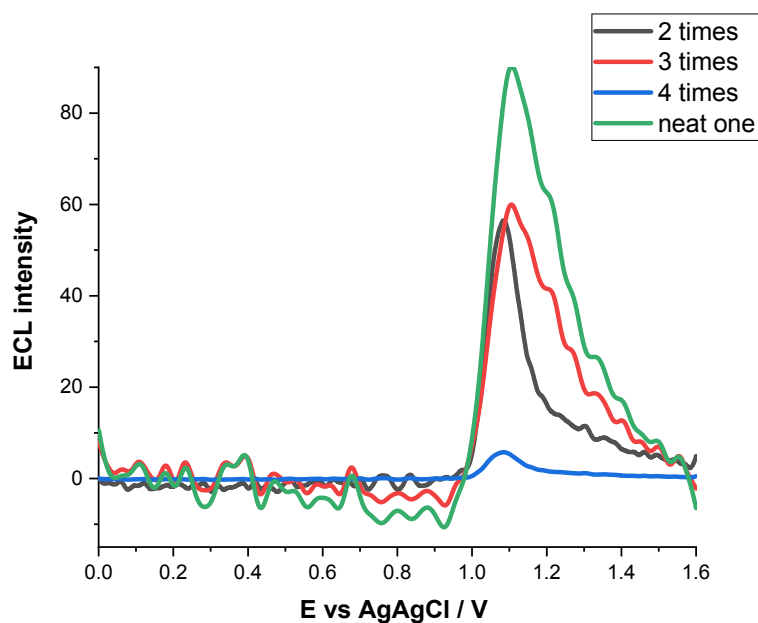

**Figure S5.** Background signals of serum neat blank and blanks after dilution (v/v). Green line is neat serum signal, black line is 2 times dilution (1:1), red line is 3 times dilution (1:2) and blue line is 4 times dilution (1:3) with 0.1 M PBS (pH = 9.0) scanned over the potential range  $0 \leq E \leq 1.6$  V vs Ag/AgCl at a scan rate of  $100 \text{ mVs}^{-1}$ . PMT was biased at 650 V. Signal to noise improved with reduced viscosity.

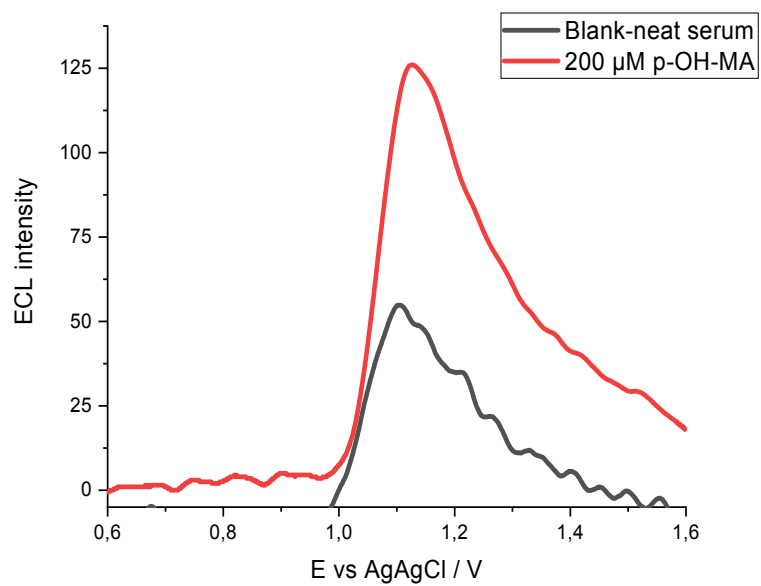

**Figure S6.** Background signal of neat serum (black line) and ECL signal of 200  $\mu\text{M}$  p-OH-MA in neat serum (red line) over the potential range  $0 \leq E \leq 1.6$  V vs Ag/AgCl at a scan rate of  $100 \text{ mVs}^{-1}$ . PMT was biased at 650 V.
